# Supplementary material for: More losses than gains during one century of plant biodiversity change in Germany
Source: Springer Nature journal article supplement (doi:10.1038/s41586-022-05320-w), 2022-10-19

## Supplementary information

---

# More losses than gains during one century of plant biodiversity change in Germany

---

In the format provided by the  
authors and unedited

## Supplementary Methods

Jandt, U., Bruelheide, H., Jansen, J., Bonn, A., Grescho, V., Klenke, R., Sabatini, F.M., Bernhardt-Römermann, M., Blüml, V., Dengler, J., Diekmann, M., Dörfler, I., Döring, U., Dullinger, S., Haider, S., Heinken, T., Horchler, P., Kuhn, G., Lindner, M., Metzke, K., Müller, N., Naaf, T., Pepler-Lisbach, C., Poschod, P., Roscher, C., Rosenthal, G., Rumpf, S., Schmidt, W., Schrautzer, W., Schwabe, A., Schwartz, P., Sperle, T., Stanik, N., Storm, C., Voigt, W., Wegener, U., Wesche, K., Wittig, B., Wulf, M. (2022): More losers than winners over one century plant diversity change in Germany. – Nature

**Supplementary Methods 1 | Steps of data preparation and analysis.** The main steps were data compilation and harmonization, taxonomic harmonization and the analyses, which were done aggregating by plot (plot resurvey ID x time interval combinations, species (across all plot resurvey IDs and intervals) and by observation interval (plot resurvey ID x species x time interval combinations).

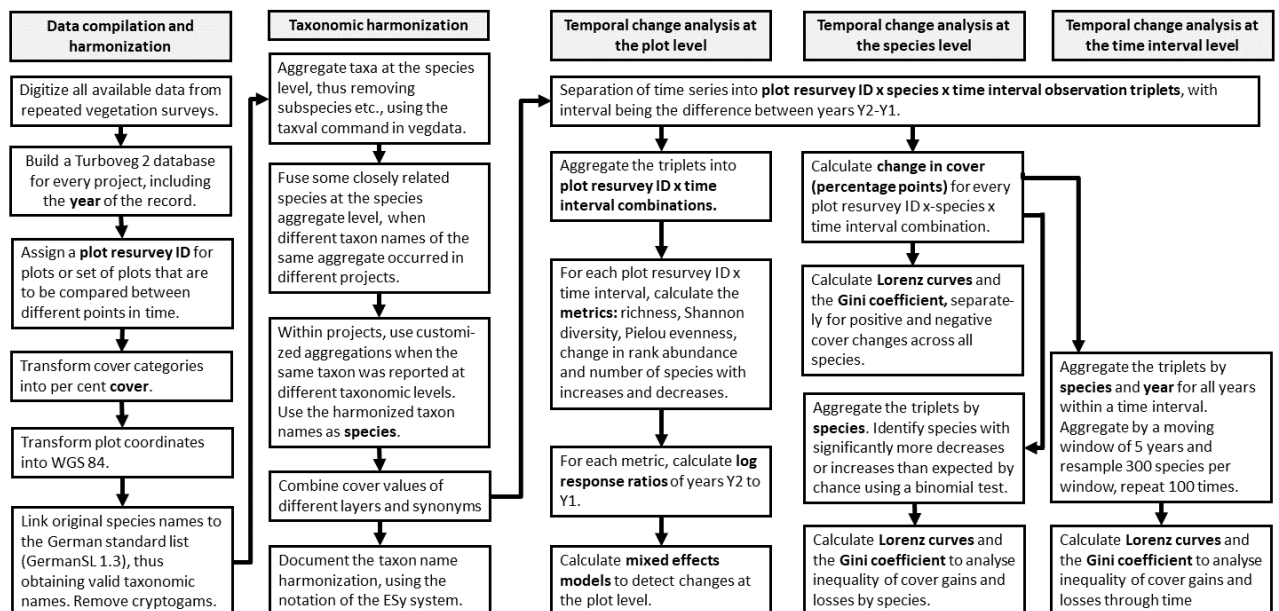

**Supplementary Methods 2 | Illustration of the null model scenarios.**

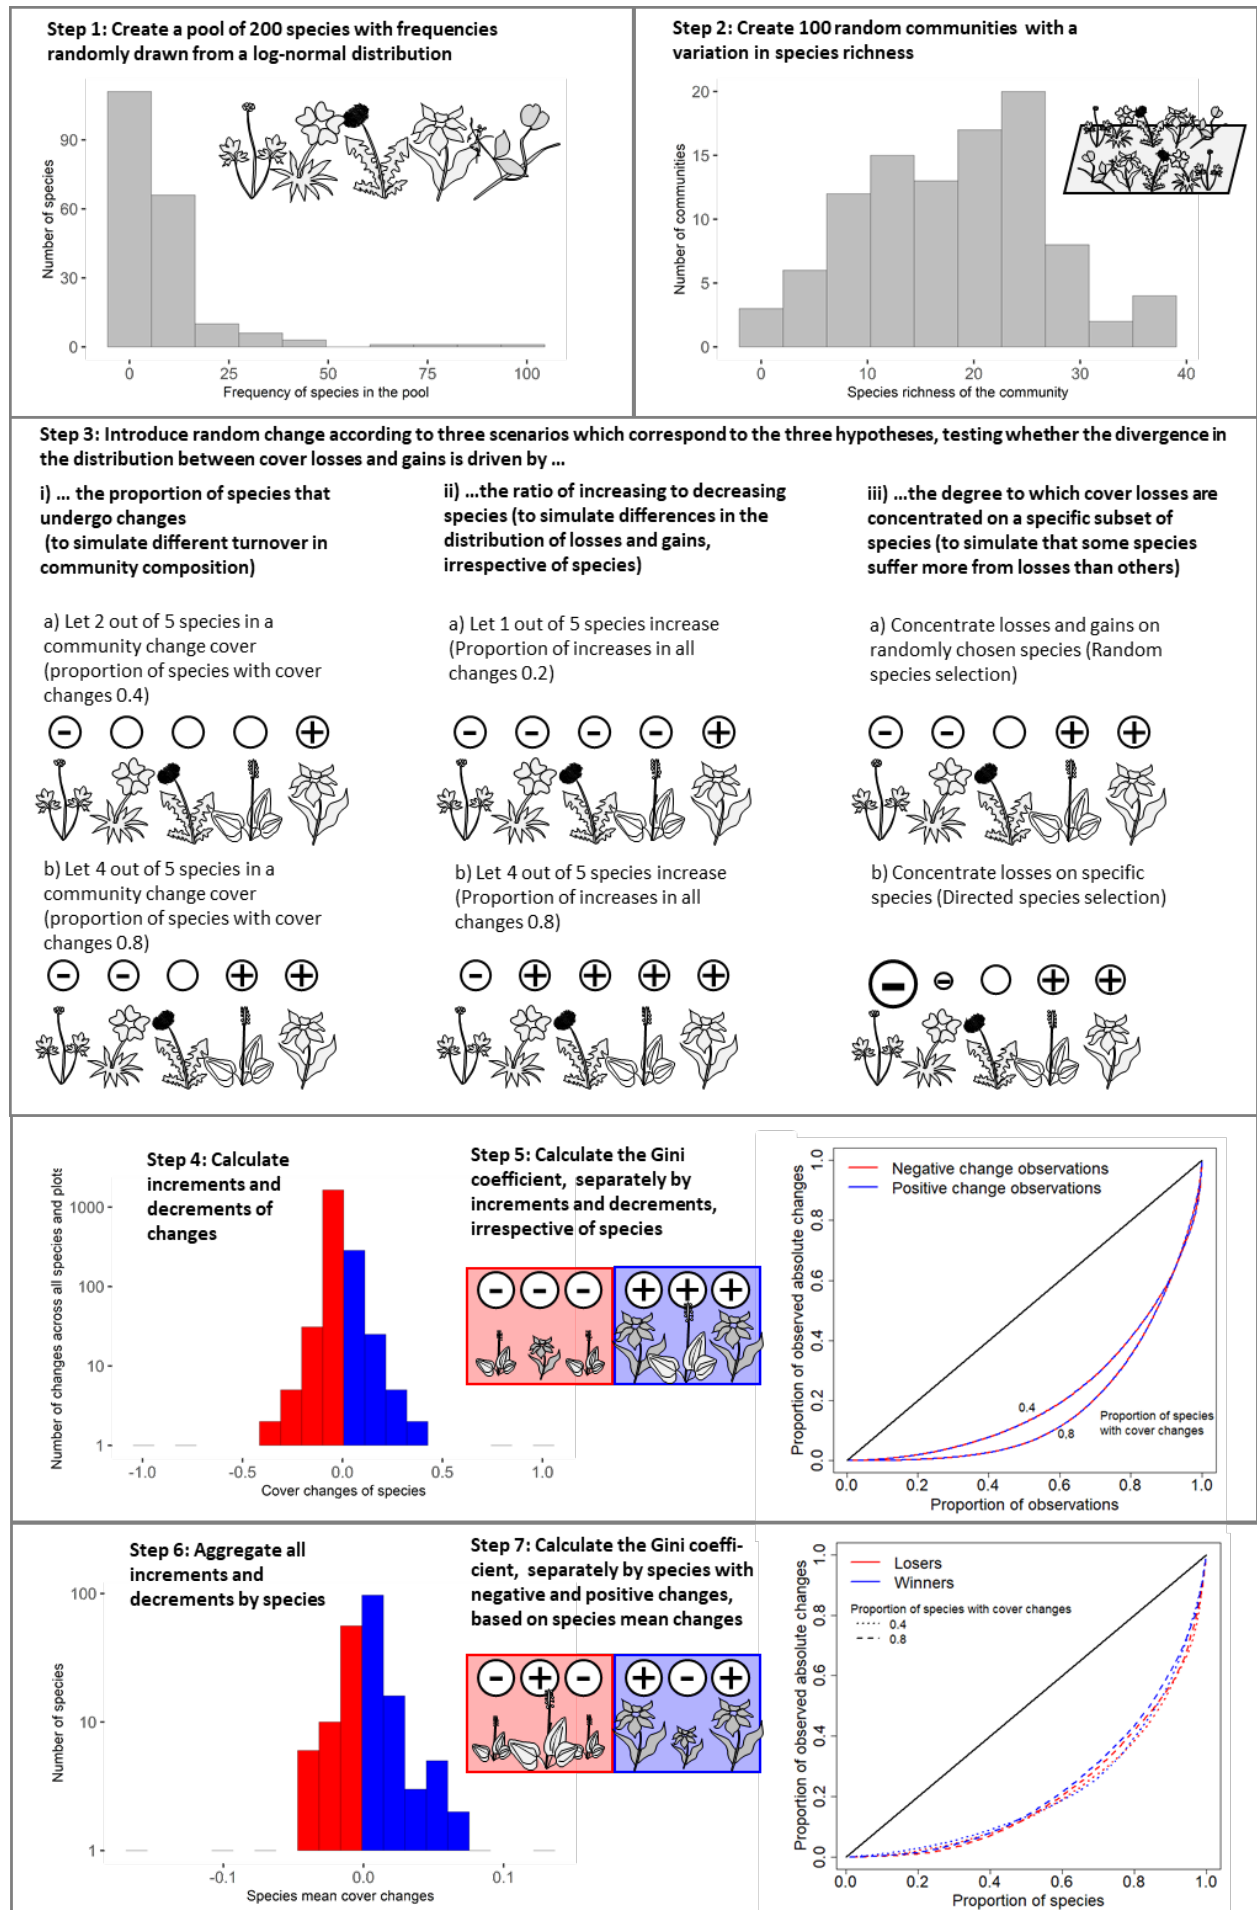

Supplement: MOESM1 [file 41586_2022_5320_MOESM1_ESM.pdf]
